# Supplementary material for: Specific 3-O-sulfated heparan sulfate domains regulate salivary gland basement membrane metabolism and epithelial differentiation
Source: PubMed Central journal article supplement (PMC11365954; doi:10.1038/s41467-024-51862-0), 2024-08-31
Supplement: 41467_2024_51862_MOESM3_ESM.pdf [file 41467_2024_51862_MOESM3_ESM.pdf]

## **Description of Additional supplementary file**

### **Supplementary data 1:**

This Excel file contains the differentially expressed genes from RNAsequencing analysis of male and female DKO SMGs compared to WT SMGs.
